# Supplementary material
Source: ML conference proceedings conference paper supplement (https://proceedings.neurips.cc/paper_files/paper/2023/hash/096b1019463f34eb241e87cfce8dfe16-Abstract.html)
Supplement: Supplementary file 1 [file 096b1019463f34eb241e87cfce8dfe16-Supplemental-Conference.zip]

Archive with 4 entries (4 files):
- AccountableBatchedControl_appendix.pdf
- __MACOSX/._AccountableBatchedControl_appendix.pdf
- AccountableBatchedControl_presentation.mp4
- __MACOSX/._AccountableBatchedControl_presentation.mp4
